# Supplementary material for: Inactivation of the Hippo tumor suppressor pathway promotes melanoma
Source: PubMed Central journal article supplement (PMC9243107; doi:10.1038/s41467-022-31399-w), 2022-06-29
Supplement: 41467_2022_31399_MOESM1_ESM.pdf [file 41467_2022_31399_MOESM1_ESM.pdf]

# Inactivation of the Hippo Tumor Suppressor Pathway Promotes Melanoma

Marc A. Vittoria<sup>1</sup>, Nathan Kingston<sup>2</sup>, Kristyna Kotynkova<sup>1</sup>, Eric Xia<sup>1</sup>, Rui Hong<sup>4</sup>, Lee Huang<sup>3</sup>, Shayna McDonald<sup>1</sup>, Andrew Tilston-Lunel<sup>2</sup>, Revati Darp<sup>5</sup>, Joshua Campbell<sup>4</sup>, Deborah Lang<sup>3</sup>, Xiaowei Xu<sup>6</sup>, Craig Ceol<sup>5</sup>, Xaralabos Varelas<sup>2</sup> and Neil J. Ganem<sup>1,4</sup>

<sup>1</sup>Department of Pharmacology & Experimental Therapeutics, Boston University School of Medicine, Boston, MA 02118, USA

<sup>2</sup>Department of Biochemistry, Boston University School of Medicine, Boston, MA 02118, USA

<sup>3</sup>Department of Dermatology, Boston University School of Medicine, Boston, MA 02118, USA

<sup>4</sup>Department of Medicine, Boston University School of Medicine, Boston, MA 02118, USA.

<sup>5</sup>Program in Molecular Medicine, University of Massachusetts Medical School, Worcester, MA 01605, USA

<sup>6</sup>Department of Pathology and Laboratory Medicine, University of Pennsylvania Perelman School of Medicine, Philadelphia, PA 19104, USA

## Supplementary Information

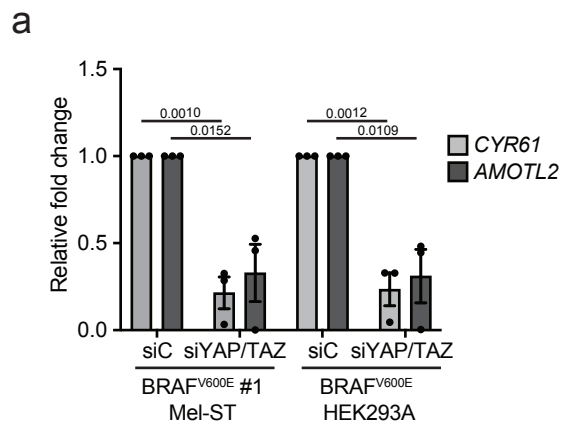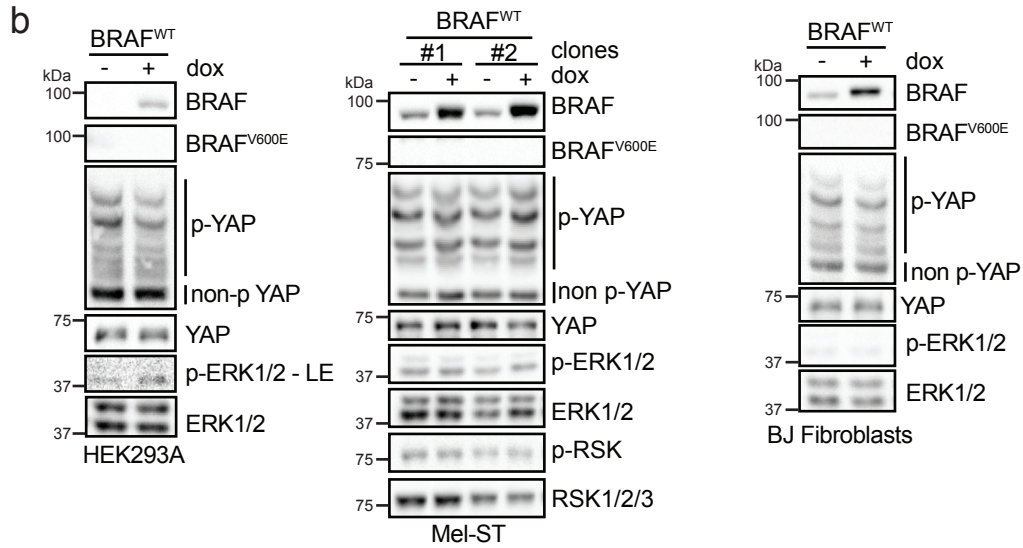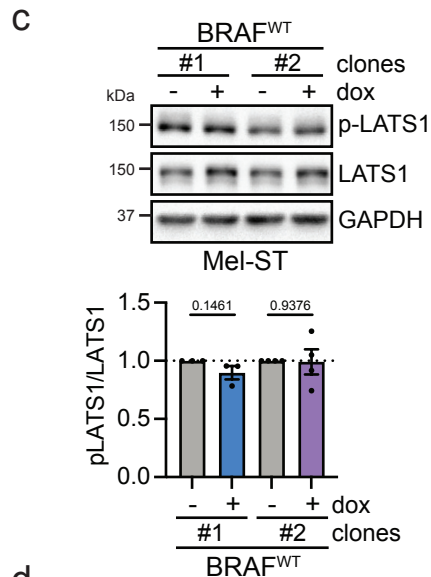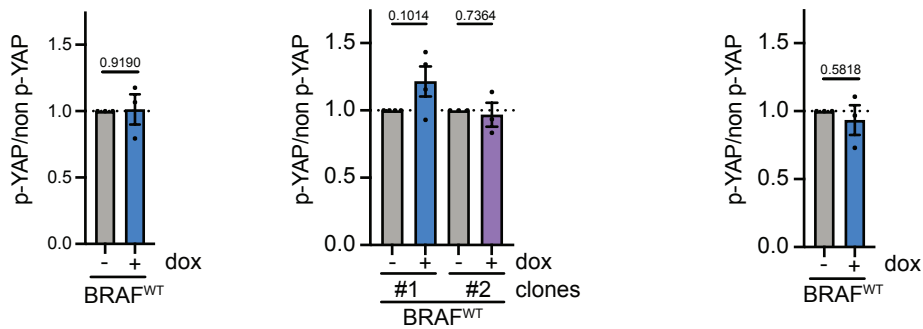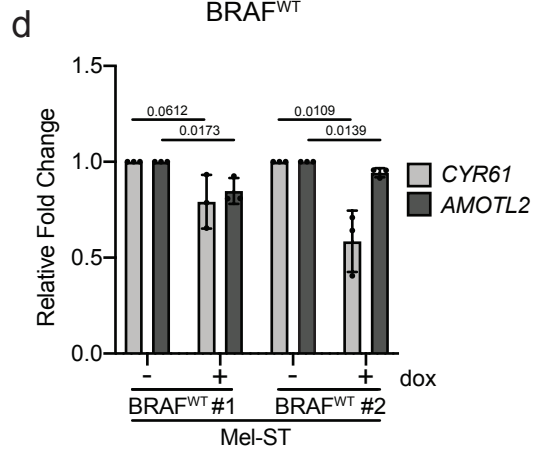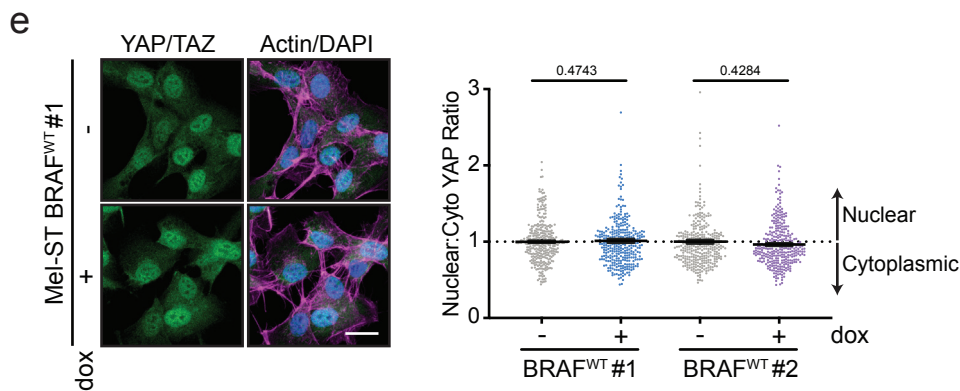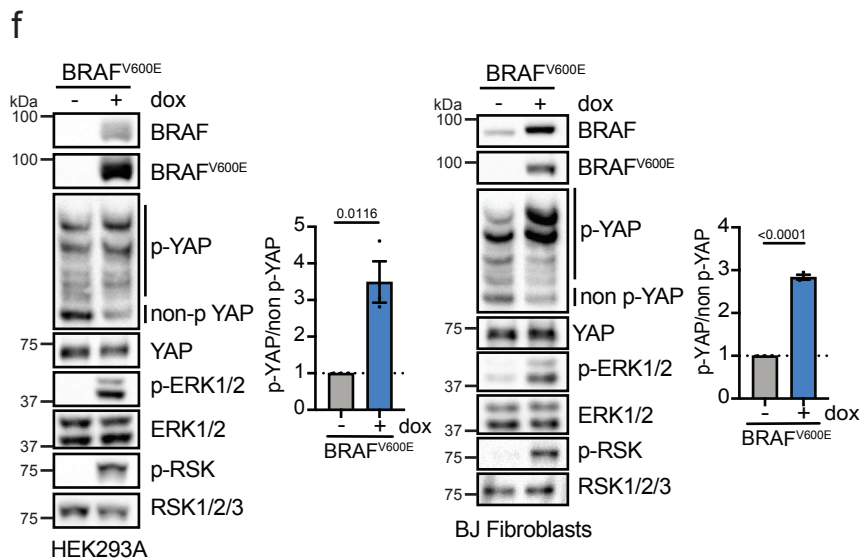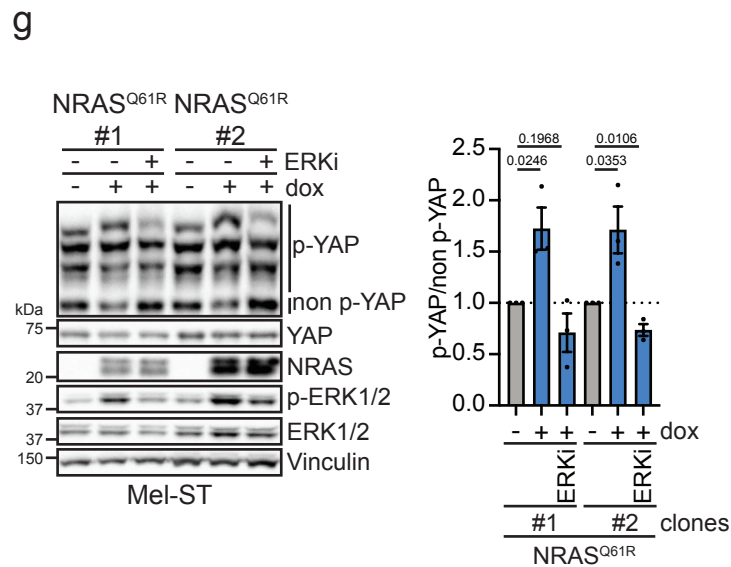

**Supplemental Figure 1: Hyperactive MAPK Signaling Activates the Hippo Pathway** (a) Relative expression of indicated genes from RT-PCR in dox-inducible *BRAF<sup>V600E</sup>* Mel-ST and HEK293A cells treated with control siRNA (siC) or YAP and TAZ siRNAs (siYAP/TAZ) without dox (n = 3 independent experiments, graph shows mean  $\pm$  SEM, two-tailed unpaired t test). (b) Representative IB of dox-inducible wild-type *BRAF* (*BRAF<sup>WT</sup>*) in HEK293A, Mel-ST, and BJ fibroblast cell lines with intensity quantification of YAP phos-tag below (n = 3 independent experiments, graphs show mean relative intensity  $\pm$  SEM, two-tailed unpaired t test). (c) IB of dox-inducible *BRAF<sup>WT</sup>* Mel-ST clones cultured  $\pm$  dox for 24 h (n  $\geq$  3 independent experiments, graph shows mean relative intensity  $\pm$  SEM, two-tailed unpaired t test). (d) Relative expression of indicated genes from RT-PCR in *BRAF<sup>WT</sup>* Mel-ST clones cultured  $\pm$  dox for 24 h (n = 3 independent experiments, graph shows mean  $\pm$  SEM, two-tailed unpaired t test). (e) Left, representative immunofluorescence image of *BRAF<sup>WT</sup>* Mel-ST clone stained for YAP/TAZ (green) alone or merged with DNA (DAPI, blue) and actin (Phalloidin, magenta); Right, quantification of nuclear to cytoplasmic ratio of mean YAP/TAZ fluorescence (n > 300 cells from three independent experiments, graph shows mean  $\pm$  SEM, scale bar = 25  $\mu$ m, two-tailed Mann-Whitney test). (f) Representative IB of dox-inducible *BRAF<sup>V600E</sup>* HEK293A and BJ cell lines with intensity quantification of YAP phos-tags (n = 3 independent experiments, graphs show mean  $\pm$  SEM, two-tailed unpaired t test). (g) Left, representative IB of dox-inducible *NRAS<sup>Q61R</sup>* Mel-ST clones cultured  $\pm$  dox for 24 h; Right, intensity quantification of YAP phos-tag (n = 3 independent experiments, graph shows mean  $\pm$  SEM, two-tailed unpaired t test). Source Data are provided as a Source Data file.

**a**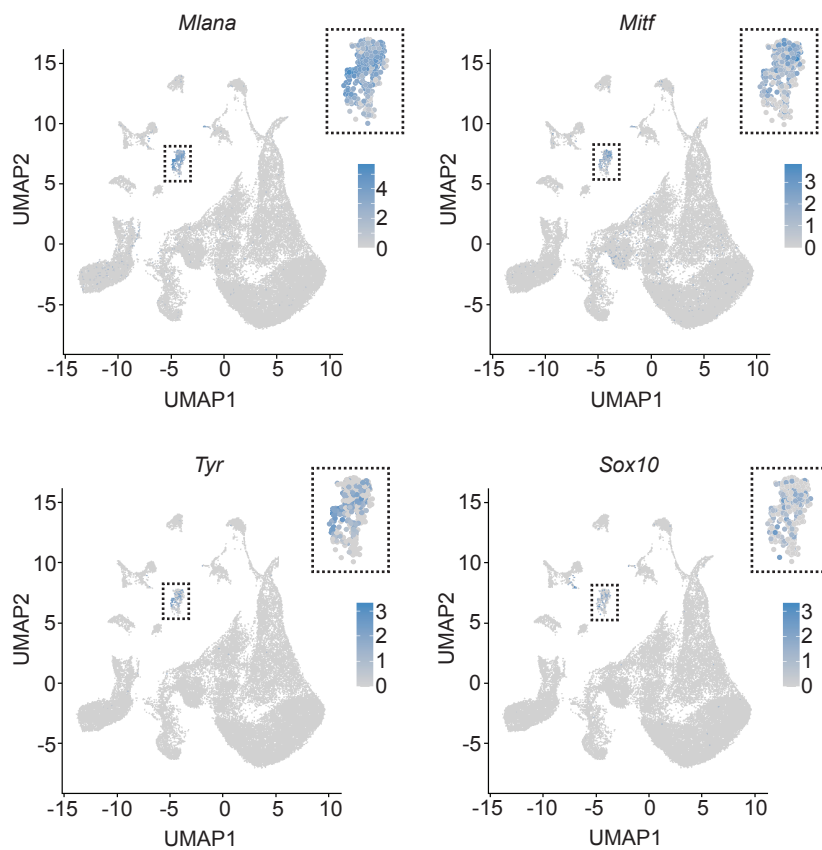**b**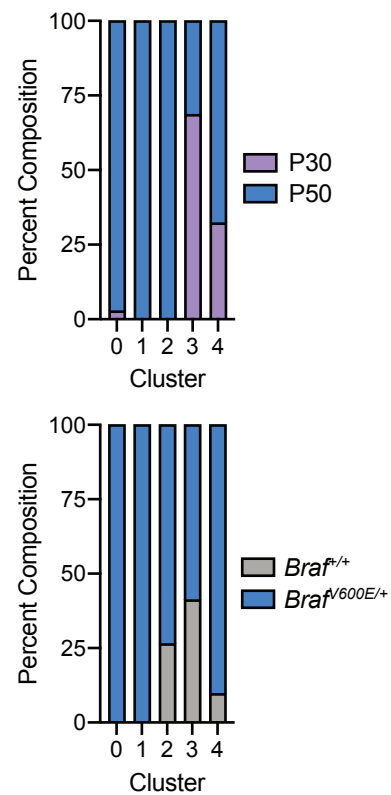**c**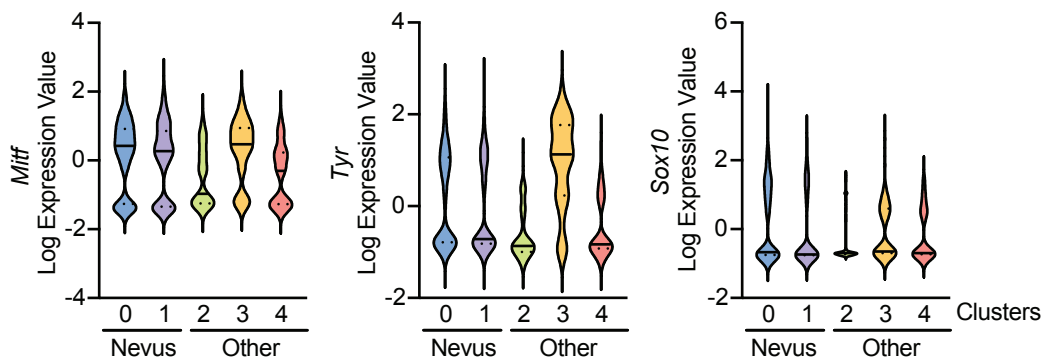**d**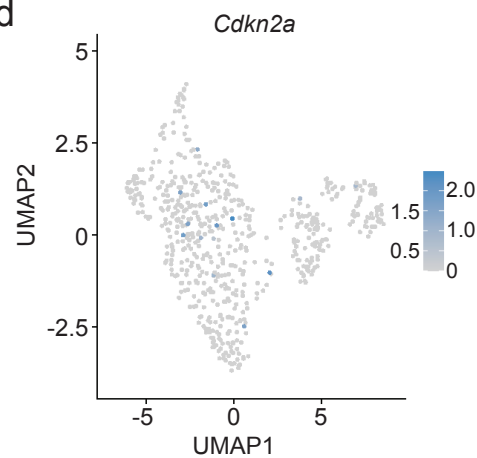**e**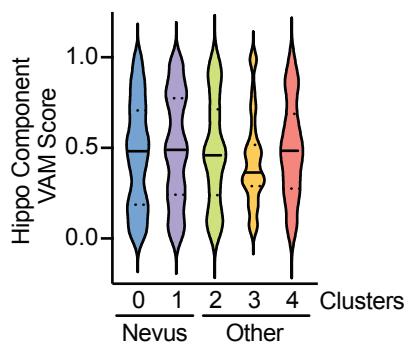**f**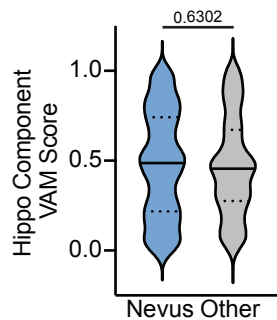**g**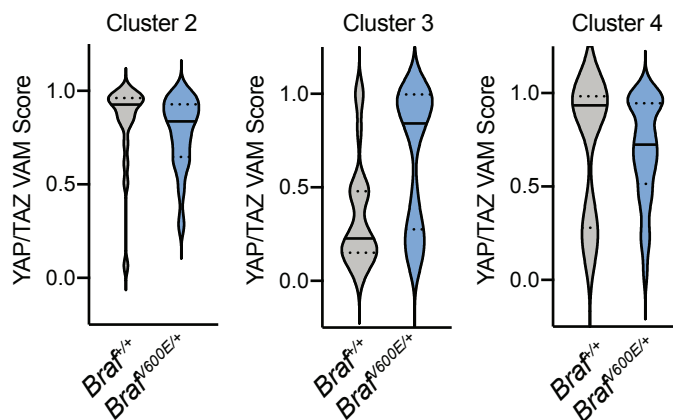



**Supplemental Figure 2: Detailed Analysis of GSE154679** (a) UMAP of all single-cells from nevus containing murine skin from GSE154679 displaying relative expression of melanocyte markers *Mlana*, *Mitf*, *Tyr*, *Sox10*. (b) Bar graphs of melanocyte subcluster composition dependent upon animal age (top) or genotype (bottom). (c) Log expression of indicated genes across melanocyte subclusters. (d) UMAP of *Cdkn2a* log expression across melanocyte subclusters (n = 589). (e) Hippo component VAM score plotted by melanocyte subcluster (n = 589). (f) Hippo component VAM score comparing nevus (clusters 0, 1) and other melanocytes (clusters 2, 3, 4) (nevus n = 408, other n = 181, two-tailed Mann-Whitney test). (g) YAP/TAZ VAM score according to indicated melanocytic subcluster and genotype. Source Data are provided as a Source Data file.

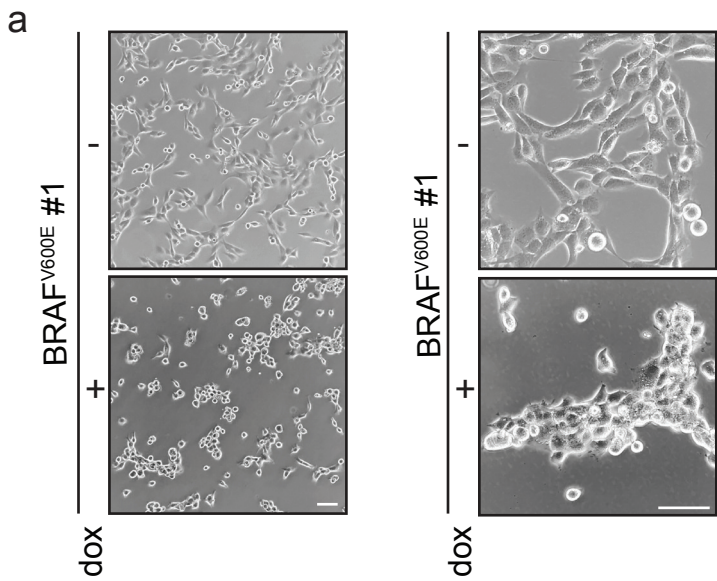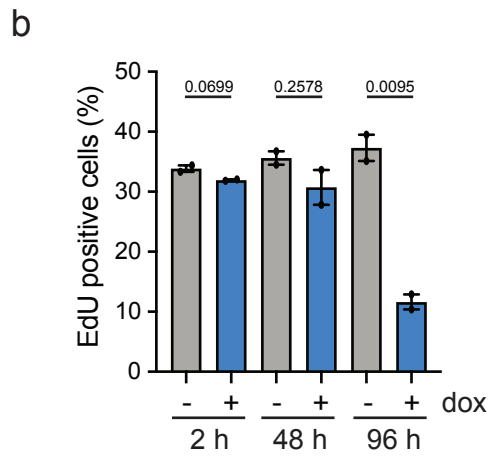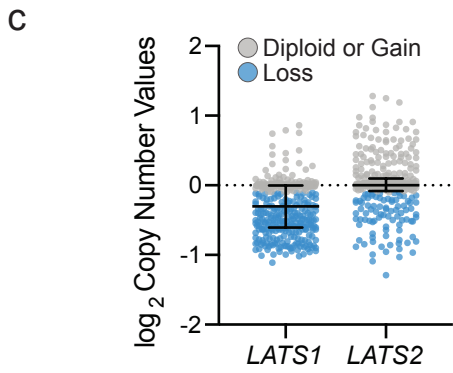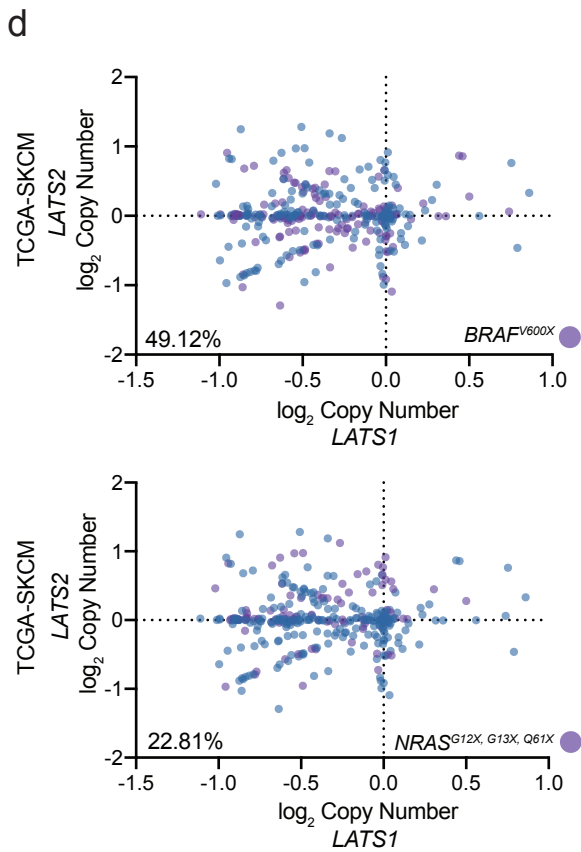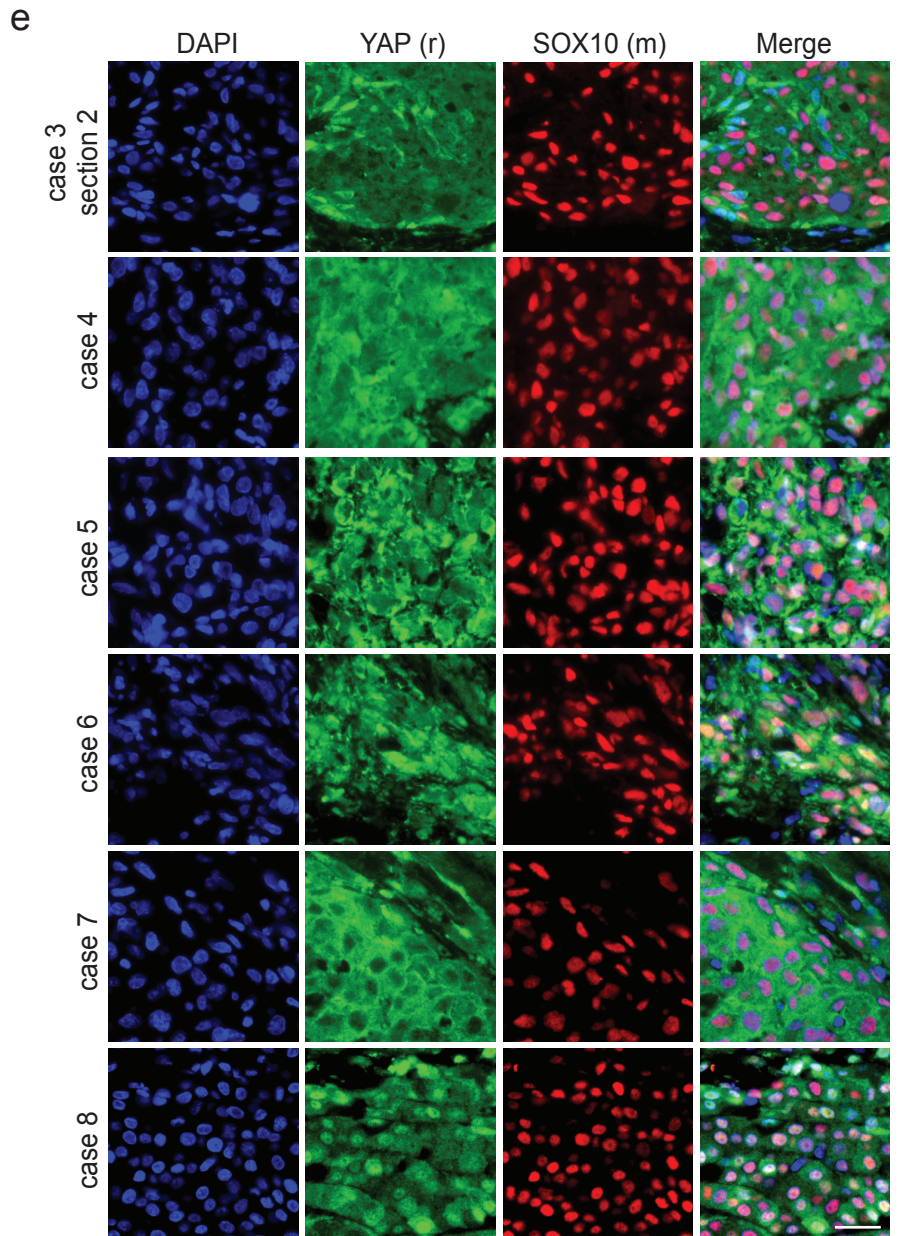

**Supplemental Figure 3: A Subset of Human Melanoma Demonstrates Hippo Pathway Inactivation**

**(a)** Representative phase-contrast images of a dox-inducible *BRAF*<sup>V600E</sup> Mel-ST clone  $\pm$  dox for 48 h at 4X magnification; Right, 10X magnification (scale bar = 100  $\mu$ m). **(b)** Percent EdU positive dox-inducible *BRAF*<sup>V600E</sup> Mel-ST cells  $\pm$  dox for indicated time (n > 200 cells per condition from 2 independent experiments, graph shows mean  $\pm$  SEM, two-tailed unpaired t test). **(c)** Plot of log<sub>2</sub> copy number values from TCGA-SKCM for indicated genes (n = 367, bars represent median with interquartile range). **(d)** Same data as Figure 3F from TCGA-SKCM with purple circles representing tumors with indicated mutations; bottom left percent is frequency of *LATS1/2* co-heterozygous loss that occurs with indicated mutations. **(e)** Representative immunofluorescence staining of indicated proteins in panel of human melanoma tissue (scale bar = 25  $\mu$ m). Source Data are provided as a Source Data file.

**a**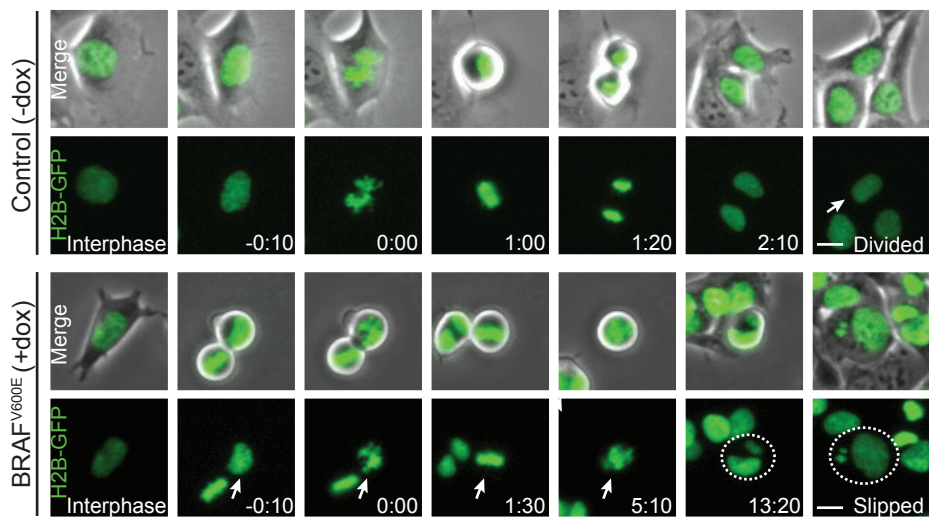**b**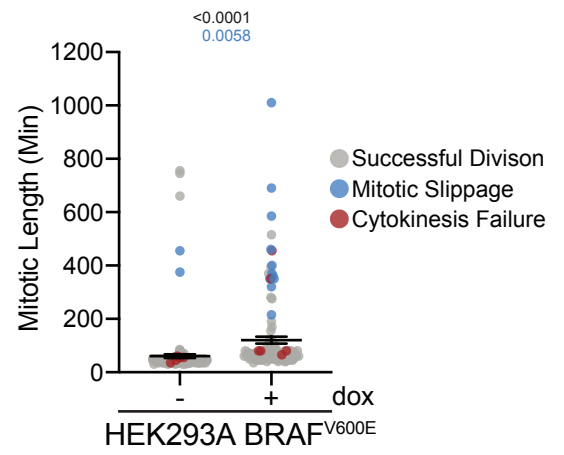**c**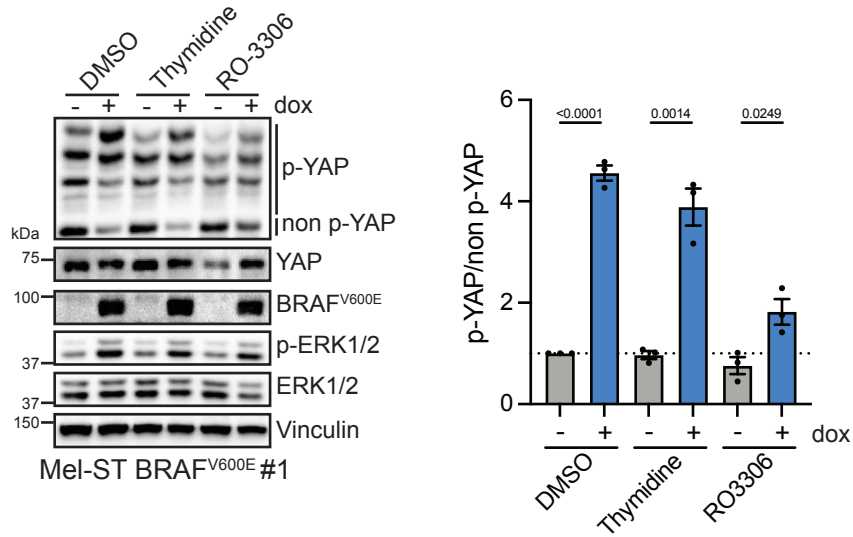

**Supplemental Figure 4: Oncogenic BRAF Promotes Mitotic Dysfunction** (a) Representative still fluorescence and phase-contrast images from a live-cell video of H2B-GFP (green) expressing dox-inducible *BRAF<sup>V600E</sup>* HEK293A cells cultured  $\pm$  dox (scale bar = 25  $\mu$ m, hh:mm). (b) Plot of mitotic duration and fate of individually tracked mitoses from (a) ( $n > 120$  mitoses per condition from two independent experiments, dots represent individually tracked mitoses, black p-value represents mitotic length significance, two-tailed unpaired t test, blue p-value represents significance for difference in frequency of whole-genome doubling events, two-sided Fisher's exact test). (c) IB of dox-inducible *BRAF<sup>V600E</sup>* Mel-ST cells treated with Thymidine 2.5 mM or RO-3306 7  $\mu$ M; Right, intensity quantification of YAP phos-tag ( $n = 3$  independent experiments, graph shows mean  $\pm$  SEM, two-tailed unpaired t test). Source Data are provided as a Source Data file.

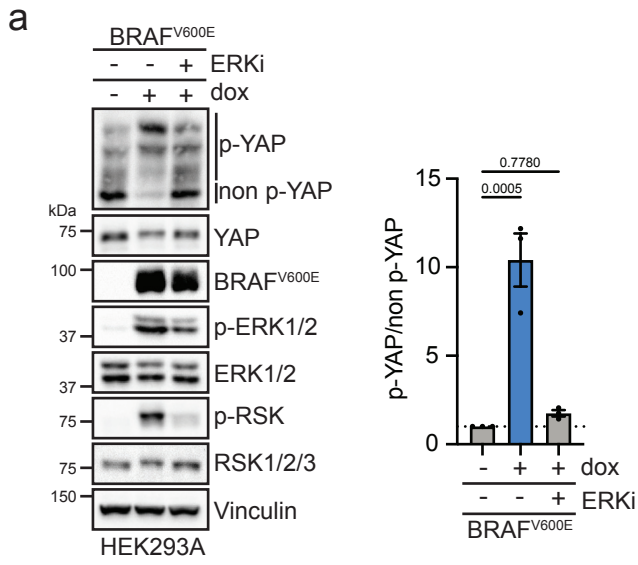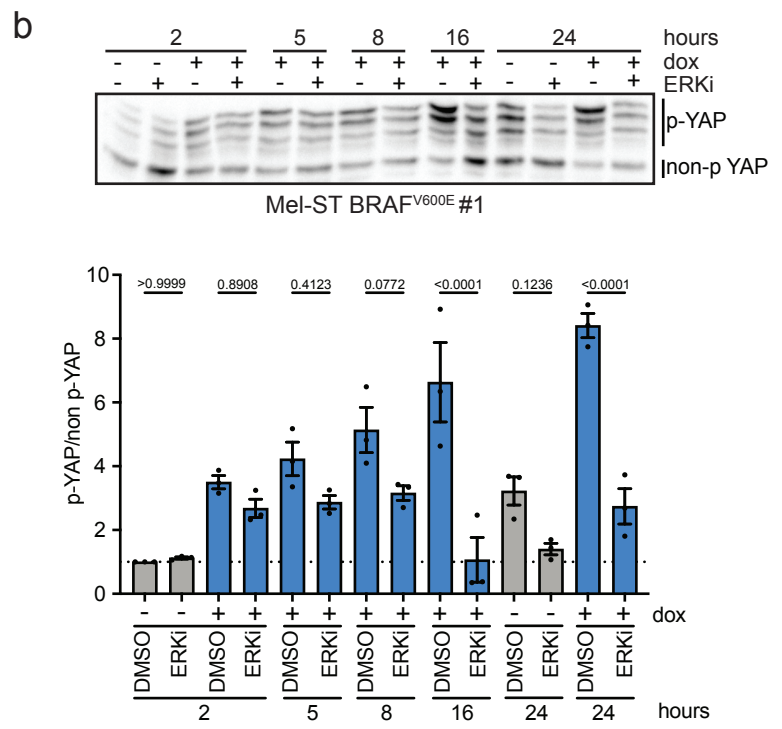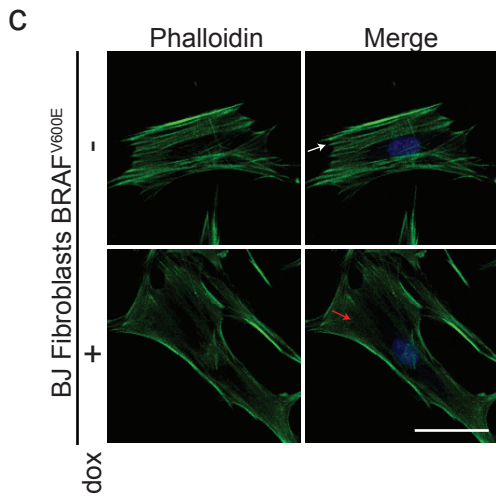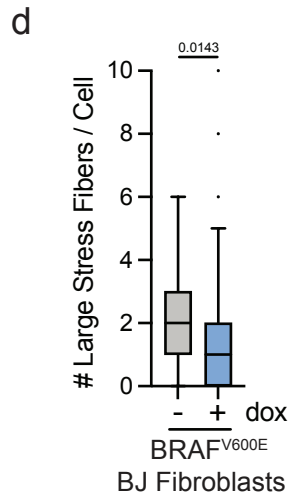

**Supplemental Figure 5: Oncogenic BRAF Promotes Hippo Pathway Activation** **(a)** IB of dox-inducible *BRAF<sup>V600E</sup>* HEK293A cells treated with indicated drugs for 24 h; Right, intensity quantification of YAP phos-tag (n = 3 independent experiments, graph shows mean  $\pm$  SEM, one-way ANOVA with Dunnett's multiple comparisons test). **(b)** IB of indicated dox-inducible *BRAF<sup>V600E</sup>* Mel-ST clone treated with or without dox for 24 h then subsequently treated with indicated drugs for time course of 2 to 24 h; Below, intensity quantification of YAP phos-tag (n = 3 independent experiments, graph shows mean  $\pm$  SEM, one-way ANOVA with Dunnett's multiple comparisons test). **(c)** Representative maximum intensity projections of confocal z-stacks of dox-inducible *BRAF<sup>V600E</sup>* BJ Fibroblasts stained for phalloidin and DAPI. Top, white arrow denotes stress fiber; Bottom, red arrow denotes lack of stress fibers (n = 2 independent experiments, scale bar = 25  $\mu$ m). **(d)** Quantification of large stress fibers per cell in Figure S5C (n > 140 cells per condition from 2 independent experiments, box is 25<sup>th</sup> to 75<sup>th</sup> percentile with line representing median, whiskers plotted via Tukey method, no dox: minima 0, 25<sup>th</sup> 1, median 2, 75<sup>th</sup> 4, maxima 6; dox: minima 0, 25<sup>th</sup> 0, median 1, 75<sup>th</sup> 2.0, maxima 10). Source Data are provided as a Source Data file.



a

| Publication                                 | Strain                                                                          | 4-HT Induction Technique | Time to Melanoma Formation                                    | developed / total n  | Time to Nevus Formation                    | developed / total n      |
|---------------------------------------------|---------------------------------------------------------------------------------|--------------------------|---------------------------------------------------------------|----------------------|--------------------------------------------|--------------------------|
| Dankort et al, 2009, <i>Nature Genetics</i> | Tyr::CreER <sup>T2</sup> , Braf <sup>CA/+</sup> , Pten <sup>+/+</sup>           | Topical                  | Aged to > 800 days without tumor formation                    | 0/22                 | ~21-28 days                                | 22/22                    |
|                                             | Tyr::CreER <sup>T2</sup> , Braf <sup>+/+</sup> , Pten <sup>lox4-5</sup>         | Topical                  | Aged ~18 months without tumor formation                       | 0/20                 | None observed                              | 0/20                     |
|                                             | Tyr::CreER <sup>T2</sup> , Braf <sup>CA/+</sup> , Pten <sup>lox4-5/+</sup>      | Topical                  | Not reported; Mice required euthanasia between 100 - 200 days | 5/5                  | Not reported                               | 5/5                      |
|                                             | Tyr::CreER <sup>T2</sup> , Braf <sup>CA/+</sup> , Pten <sup>lox4-5/lox4-5</sup> | Topical                  | Not reported; Mice required euthanasia between 25-50 days     | 22/22                | Pigmented lesions rapidly became malignant | ---                      |
| Ruiz-Vega et al, 2020, <i>eLife</i>         | Tyr::CreER <sup>T2</sup> , Braf <sup>CA/+</sup>                                 | Topical                  | Length of aging not reported, no tumor formation noted        | none, n not reported | ~14-21 days                                | all mice, n not reported |

b

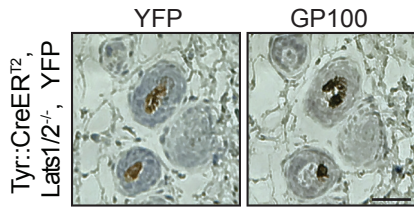

c

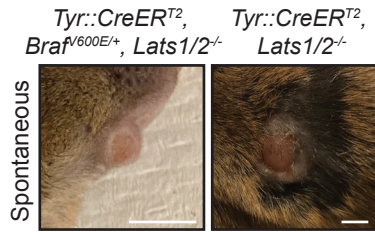

d

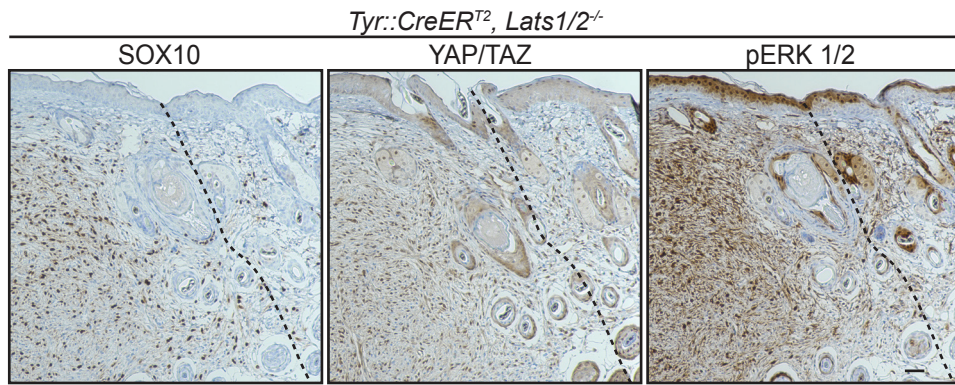

e

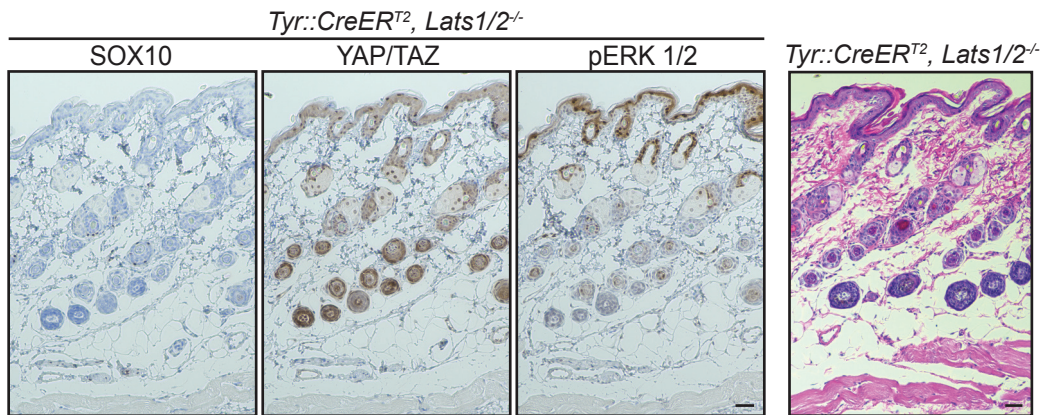

f

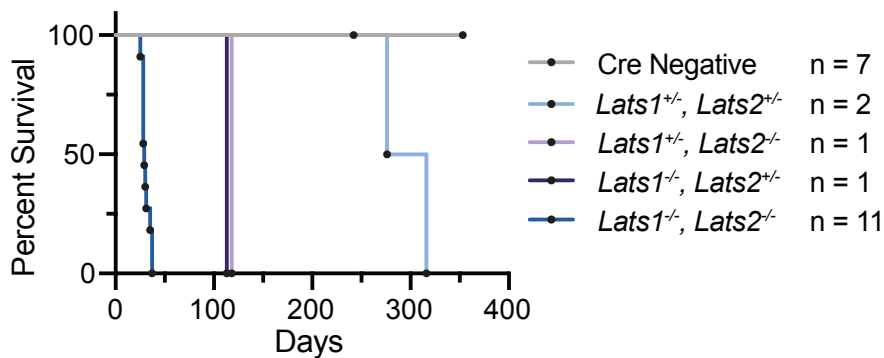

g

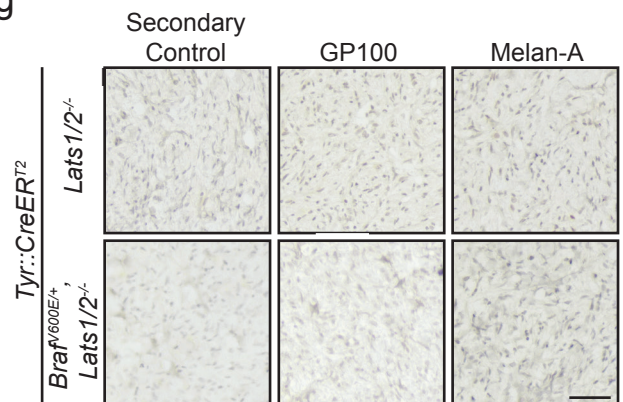



**Supplemental Figure 6: Characterization of *Lats1/2*<sup>-/-</sup> Melanoma** (a) Table of publications with rate of nevus or melanoma formation in various *Braf*<sup>CA</sup>-expressing mice. (b) Representative IHC of indicated proteins, scale bar = 40 μm (n ≥ 2 independent mice with similar results). (c) Representative images of spontaneous *Braf*<sup>V600E</sup>/*Lats1/2*<sup>-/-</sup> or *Lats1/2*<sup>-/-</sup> mouse tumors, scale bars = 0.5 cm. (d) Representative IHC of indicated proteins in *Lats1/2*<sup>-/-</sup> tumor (left of dotted line) and normal adjacent tissues (right of dotted line), scale bar = 40 μm, n ≥ 3 mice with similar results. (e) Representative IHC of indicated proteins of *Lats1/2*<sup>-/-</sup> mouse skin treated with 4-HT prior to tumorigenesis; right is a hematoxylin and eosin staining of a serial section, scale bar = 40 μm, n = 1 mouse. (f) Time from IP injection of tamoxifen to a study endpoint of mice with indicated genotypes. (g) Representative IHC of indicated proteins including secondary antibody only control, scale bar = 40 μm, n ≥ 2 mice with similar results. Source Data are provided as a Source Data file.

a

| NAME                                                   | SIZE | ES       | NES        | NOM p-val   | FDR q-val  |
|--------------------------------------------------------|------|----------|------------|-------------|------------|
| CORDENONSI_YAP_CONSERVED_SIGNATURE                     | 57   | 0.642258 | 2.051217   | 0           | 0          |
| WANGETAL_YAPTAZ_TARGET_SCORE                           | 22   | 0.764397 | 2.0402122  | 0           | 0          |
| YAP1_UP                                                | 45   | 0.45573  | 1.4316236  | 0.054347824 | 0.11726231 |
| REACTOME_YAP1_AND_WWTR1_TAZ_STIMULATED_GENE_EXPRESSION | 15   | 0.336619 | 0.84074897 | 0.68662953  | 0.86892515 |
| REACTOME_RUNX3_REGULATES_YAP1_MEDIATED_TRANSCRIPTION   | 8    | 0.347339 | 0.7453292  | 0.7538226   | 0.8074144  |

b

*Tyr::CreERT<sup>2</sup>, Cdkn2a<sup>-/-</sup>, Lkb1<sup>-/-</sup>, Braf<sup>V600E</sup>* > *Tyr::CreERT<sup>2</sup>, Lkb1<sup>-/-</sup>, Braf<sup>V600E</sup>*  
 Enriched in Melanoma > Non-malignant Lesion

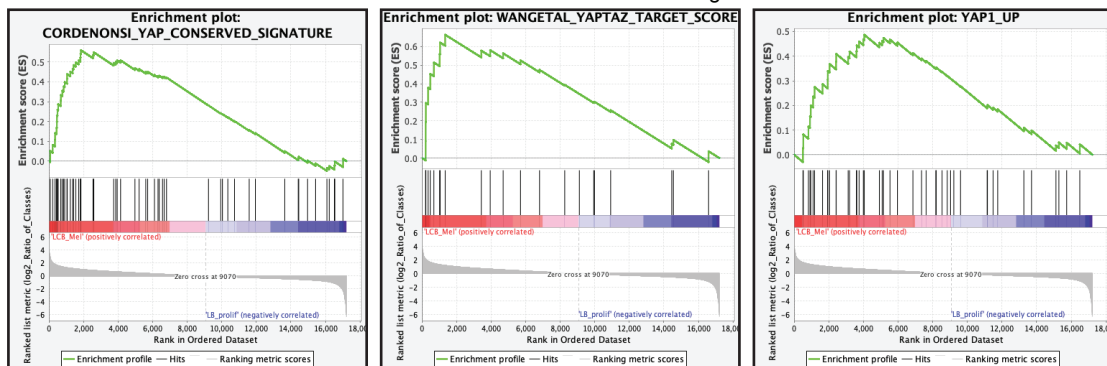

c

| NAME                                                   | SIZE | ES         | NES       | NOM p-val   | FDR q-val  |
|--------------------------------------------------------|------|------------|-----------|-------------|------------|
| CORDENONSI_YAP_CONSERVED_SIGNATURE                     | 57   | 0.55971074 | 1.9228522 | 0           | 0          |
| WANGETAL_YAPTAZ_TARGET_SCORE                           | 22   | 0.66323537 | 1.866832  | 0.001477105 | 5.03E-04   |
| YAP1_UP                                                | 45   | 0.48710054 | 1.5982525 | 0.005633803 | 0.01708542 |
| REACTOME_RUNX3_REGULATES_YAP1_MEDIATED_TRANSCRIPTION   | 8    | 0.5892833  | 1.3134943 | 0.14194578  | 0.16061561 |
| REACTOME_YAP1_AND_WWTR1_TAZ_STIMULATED_GENE_EXPRESSION | 15   | 0.22996822 | 0.598145  | 0.95348835  | 0.9587438  |

d

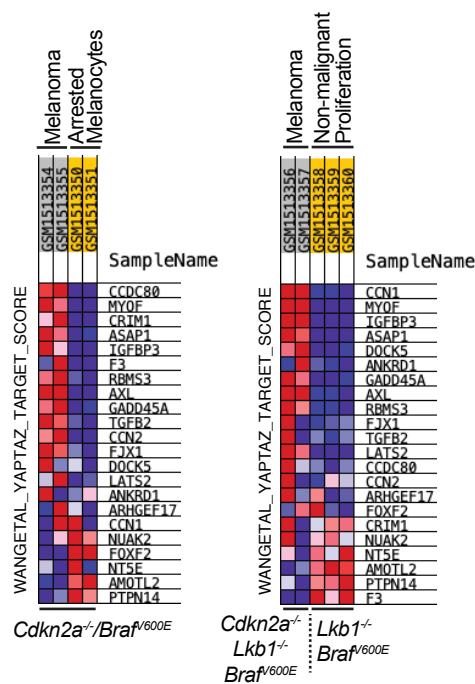

e

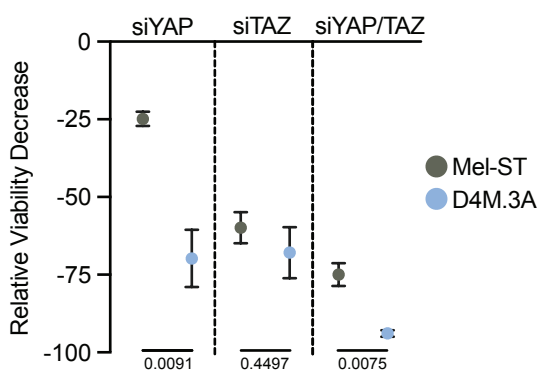

f

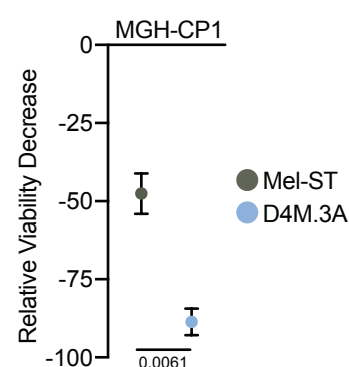

**Supplemental Figure 7: YAP/TAZ Activation is Enriched in Animal Melanoma Models** **(a)** Table of GSEA results from Figure 6A, see methods for full statistical analysis. **(b)** GSEA performed on GSE61750 comparing enrichment of YAP/TAZ signatures in melanoma to benign, proliferating melanocytes in indicated genotypes (see Figure S7D). **(c)** Table of GSEA results from Figure S7B. **(d)** GSEA heatmap results of gene expression from Figure 6A and S7B (red indicates higher expression, blue lower). **(e)** Percent relative viability decrease in indicated cell lines treated with siRNA targeting YAP (siYAP), TAZ (siTAZ) or a combination (siYAP/TAZ) for 4 days compared to control siRNA treated cells (n = 3 independent experiments with  $\geq 5$  technical replicates, graph shows mean  $\pm$  SEM, two-tailed unpaired t test). **(f)** Relative viability of D4M.3A or Mel-ST cells treated with 10  $\mu$ M TEAD inhibitor MGH-CP1 (n = 3 independent experiments with  $\geq 5$  technical replicates, graph shows mean  $\pm$  SEM, two-tailed unpaired t test). Source Data are provided as a Source Data file.

a

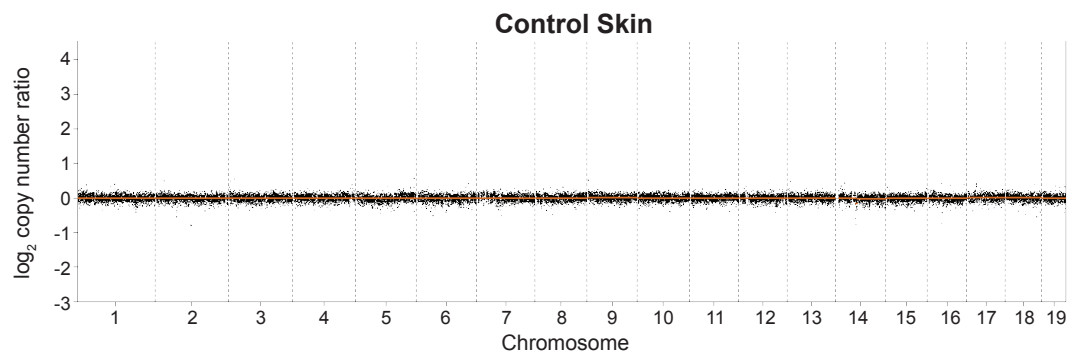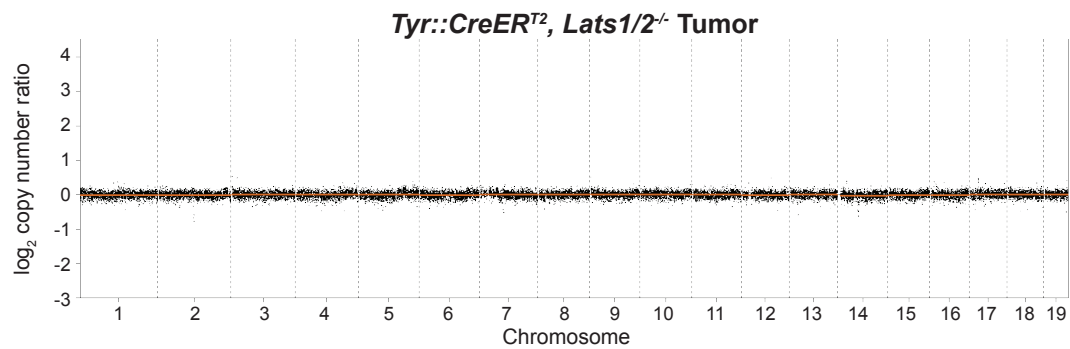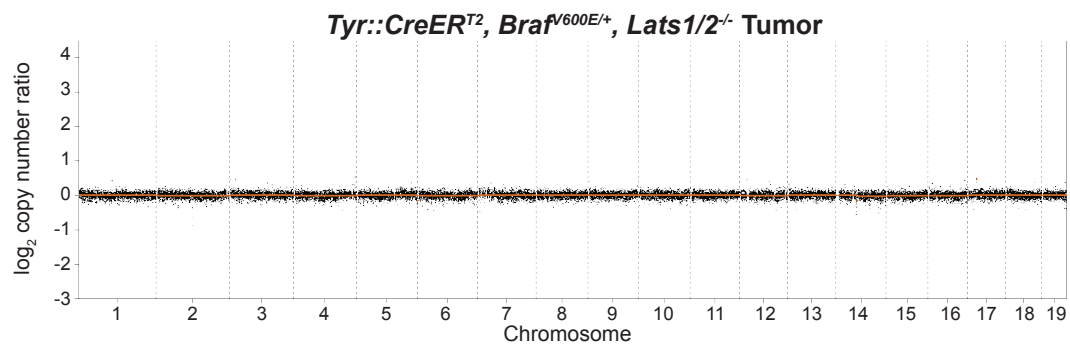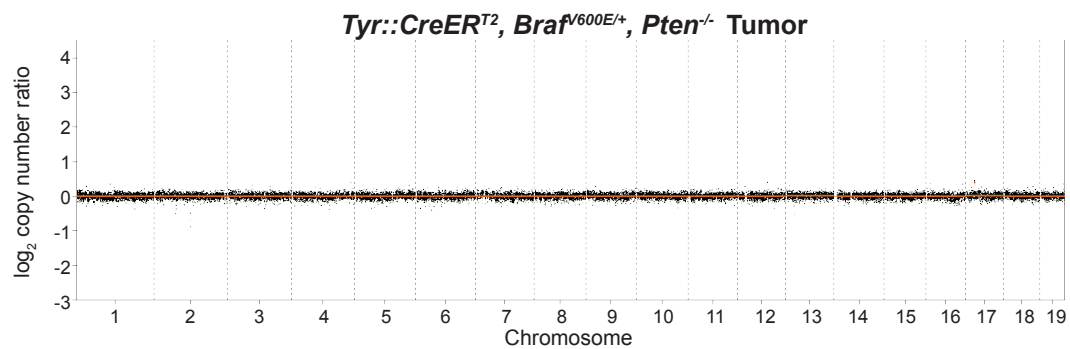

**Supplemental Figure 8: Murine Melanomas Lack Significant Aneuploidy (a)** Representative copy number plots of ULP-WGS copy number analysis of control skin (*Tyr::CreER<sup>T2-/-</sup>*) or tumors from indicated genotypes (control n = 1, *Lats1/2<sup>-/-</sup>* n = 3, *Braf<sup>V600E</sup>/Lats1/2<sup>-/-</sup>* n = 2, *Braf<sup>V600E</sup>/PTEN<sup>-/-</sup>* n = 3). Source Data are provided as a Source Data file.

**Supplementary Table 1: YAP/TAZ Gene Set**

| <b>Gene</b>  | <b>Derived from:</b>          | <b>Gene</b> | <b>Derived from:</b>          |
|--------------|-------------------------------|-------------|-------------------------------|
| AGFG2        | Cordenonsi                    | IGFBP3      | Wang et al. 2018              |
| AMOTL2       | Cordenonsi / Wang et al. 2018 | ITGB2       | Cordenonsi                    |
| ANKRD1       | Cordenonsi / Wang et al. 2018 | ITGB5       | Cordenonsi                    |
| ARHGEF17     | Wang et al. 2018              | LATS2       | Wang et al. 2018              |
| ASAP1        | Cordenonsi / Wang et al. 2018 | LHFPL6      | Cordenonsi                    |
| AXL          | Cordenonsi / Wang et al. 2018 | MARCKS      | Cordenonsi                    |
| BICC1        | Cordenonsi                    | MDFIC       | Cordenonsi                    |
| BIRC5        | Cordenonsi                    | MYOF        | Wang et al. 2018              |
| CAVIN2       | Cordenonsi                    | NDRG1       | Cordenonsi                    |
| CCDC80       | Wang et al. 2018              | NT5E        | Wang et al. 2018              |
| CDC20        | Cordenonsi                    | NUAK2       | Wang et al. 2018              |
| CDKN2C       | Cordenonsi                    | PDLIM2      | Cordenonsi                    |
| CENPF        | Cordenonsi                    | PHGDH       | Cordenonsi                    |
| COL4A3       | Cordenonsi                    | PMP22       | Cordenonsi                    |
| CRIM1        | Cordenonsi / Wang et al. 2018 | PTPN14      | Wang et al. 2018              |
| CCN2 (CTGF)  | Cordenonsi / Wang et al. 2018 | RBMS3       | Wang et al. 2018              |
| CCN1 (CYR61) | Cordenonsi / Wang et al. 2018 | SCHIP1      | Cordenonsi                    |
| DAB2         | Cordenonsi                    | SERPINE1    | Cordenonsi                    |
| DDAH1        | Cordenonsi                    | SGK1        | Cordenonsi                    |
| DLC1         | Cordenonsi                    | SH2D4A      | Cordenonsi                    |
| DOCK5        | Wang et al. 2018              | SHCBP1      | Cordenonsi                    |
| DUSP1        | Cordenonsi                    | SLIT2       | Cordenonsi                    |
| DUT          | Cordenonsi                    | STMN1       | Cordenonsi                    |
| ECT2         | Cordenonsi                    | TGFB2       | Cordenonsi / Wang et al. 2018 |
| EMP2         | Cordenonsi                    | TGM2        | Cordenonsi                    |
| ETV5         | Cordenonsi                    | THBS1       | Cordenonsi                    |
| F3           | Wang et al. 2018              | TK1         | Cordenonsi                    |
| FGF2         | Cordenonsi                    | TNNT2       | Cordenonsi                    |
| FJX1         | Wang et al. 2018              | TNS1        | Cordenonsi                    |
| FLNA         | Cordenonsi                    | TOP2A       | Cordenonsi                    |
| FOXF2        | Wang et al. 2018              | TSPAN3      | Cordenonsi                    |
| FSCN1        | Cordenonsi                    |             |                               |
| FSTL1        | Cordenonsi                    |             |                               |
| GADD45A      | Wang et al. 2018              |             |                               |
| GADD45B      | Cordenonsi                    |             |                               |
| GAS6         | Cordenonsi                    |             |                               |
| GGH          | Cordenonsi                    |             |                               |
| GLS          | Cordenonsi                    |             |                               |
| HEXB         | Cordenonsi                    |             |                               |
| HMMR         | Cordenonsi                    |             |                               |

**Supplementary Table 2: Hippo  
Component Gene Set**

**Genes**

---

AMOT  
AMOTL1  
AMOTL2  
CASP3  
DVL2  
LATS1  
LATS2  
MOB1A  
MOB1B  
NPHP4  
SAV1  
STK3  
STK4  
TJP1  
TJP2  
WWC1  
WWTR1  
YAP1  
YWHAB  
YWHAE  
TEAD1  
TEAD2  
TEAD3  
TEAD4
